# Supplementary material
Source: Springer Nature journal article supplement (https://www.springermedizin.de/resource/supplementary/12933_2009_193_MOESM1_ESM.pdf/9539800)
Supplement: MOESM1 [file 9539800]

**Supplemental data: Primer list**

|              |           | Forward                     | Reversed                    |
|--------------|-----------|-----------------------------|-----------------------------|
| GLUT4        | NM_012751 | 5'-AGGCACCCTCACTACCCTTT-3'  | 5'-TTTCCTTCCCAACCATTGAG-3'  |
| EF1 $\alpha$ | NM_175838 | 5'-GGGGACAATGTAGGCTTCAA-3'  | 5'-TCCATTGGTGGGTCATTTTT-3'  |
| HPRT         | NM_000194 | 5'-GGTCCTTTTCACCAGCAAGCT-3' | 5'-TGACACTGGCAAAACAATGCA-3' |
